# Supplementary material for: Genome-wide association study of resistance to stripe rust (Puccinia striiformis f. sp. tritici) in Sichuan wheat
Source: BMC Plant Biol. 2019 Apr 16;19:147. doi: 10.1186/s12870-019-1764-4 (PMC6469213; doi:10.1186/s12870-019-1764-4)
Supplement: Supplementary file 1 — The 244 wheat accessions used in this study and the evaluation of their infection type (IT) and disease Severity (DS) in six environments. (XLSX 36 kb) [file 12870_2019_1764_MOESM1_ESM.xlsx]

## Sheet: Additional file 1
Additional file 1 The 244 wheat accessions used in this study and the evaluation of their infection type (IT) and disease Severity (DS) in six environments
Type	Accession Namea	Origin	AS_No.b	CGRIS_Noc	Predigree	Released Year	Infection Type (IT)d							Disease Severity (DS, %)
							CZ15	CZ16	MY16	CZ17	MY17	WJ17	BLUP valuese	CZ15	CZ16	MY16	CZ17	MY17	WJ17	BLUP valuese
Landraces	Baimaizi	Kaijiang	AS1558	-	-	-	2	2	2	1	1	1	2	10	20	20	5	5	5	20
	Dongmai'er	Anyue	AS1590	-	-	-	1	1	1	2	1	2	2	0	5	5	10	5	5	10
	Baixiapmai	Santai	AS1648	-	-	-	4	4	3	3	3	3	3	100	20	80	20	40	20	40
	-	-	AS1073	-	-	-	3	3	2	2	1	2	2	20	20	40	5	5	5	20
	Tuomai	Bazhong	AS1556	-	-	-	3	3	3	3	3	4	3	40	40	80	40	80	40	60
	Yuermai	Tongjiang	AS1563	-	-	-	3	4	1	3	2	-	3	40	20	10	20	10	5	20
	liulengxiaomai	Changning	AS1573	-	-	-	3	2	2	2	1	1	2	40	10	20	20	0	0	20
	Guangtoumai	Luxian	AS1574	-	-	-	3	3	3	2	2	3	3	60	20	20	20	10	20	20
	Guangtouhonghuamai	Luxian	AS1576	-	-	-	3	3	3	3	2	3	3	40	40	20	20	5	5	20
	Heshangmai	Luxian	AS1577	-	-	-	3	4	3	3	2	3	3	60	40	40	40	10	20	40
	Zhaoyaguangtou	Luxian	AS1578	-	-	-	2	3	1	2	1	1	2	20	10	10	20	0	5	20
	Zaohuangmai	Qingfu	AS1580	-	-	-	2	3	2	2	1	4	2	20	20	40	10	0	5	20
	Dalongxu	Gusong	AS1581	-	-	-	1	1	1	1	1	1	1	10	5	5	5	5	0	10
	Dahonghua	Gusong	AS1582	-	-	-	3	3	3	2	1	3	3	40	40	40	10	10	5	20
	Piantaer	Pingshan	AS1583	-	-	-	3	4	3	-	2	4	3	60	80	80	20	5	80	60
	Xuxubaimaizi	Longchang	AS1587	-	-	-	2	3	1	1	1	1	2	10	10	5	5	0	5	10
	Erlengxuxumai	Fushun	AS1588	-	-	-	2	3	1	2	1	1	2	20	10	5	10	0	5	10
	Dalaokemai	Fushun	AS1589	-	-	-	3	3	3	3	2	4	3	40	20	40	40	20	10	40
	Hongxiaomai	Anyue	AS1591	-	-	-	2	1	1	1	1	1	1	10	5	5	5	5	0	10
	Honghuamai 1	Lezhi	AS1592	-	-	-	3	4	3	2	4	4	3	60	60	80	10	0	5	40
	Honghuamai 2	Lezhi	AS1593	-	-	-	3	2	3	1	1	1	2	60	20	20	5	0	5	20
	Hongtiaomai	Lezhi	AS1594	-	-	-	3	1	1	1	1	1	2	60	20	5	5	0	5	20
	Baihuamai	Lezhi	AS1595	-	-	-	3	3	1	2	1	1	2	60	20	20	10	0	10	20
	Dahuangpao	Zizhong	AS1596	-	-	-	2	1	3	2	2	1	2	20	10	20	5	5	0	20
	Dahonghua	Zizhong	AS1597	-	-	-	1	1	3	2	1	3	2	10	5	60	10	5	5	20
	Dahongpao	Zizhong	AS1598	-	-	-	4	3	3	3	1	3	3	80	20	60	20	5	5	40
	Youmangnanmai	Zizhong	AS1599	-	-	-	1	1	1	1	1	1	1	10	5	0	0	0	0	10
	Tianlvchangxiaomai	Deyang	AS1635	-	-	-	2	1	1	3	1	1	2	20	10	5	20	0	0	10
	Yuweimai	Tongnan	AS1641	-	-	-	1	1	1	1	1	1	1	0	10	5	0	0	0	10
	Qinggangmai	Shehong	AS1644	-	-	-	3	3	3	2	2	2	3	40	20	60	10	40	10	40
	Aizihuoshaomai	Zhongjiang	AS1646	-	-	-	3	1	1	1	1	1	2	60	5	5	5	0	0	20
	Luohanmai	Zhongjiang	AS1647	-	-	-	4	1	2	2	1	1	2	100	10	60	5	5	0	40
	Honghuamai	Jiangjin	AS1651	-	-	-	3	4	3	3	2	1	3	60	20	60	10	5	5	40
	Baixiaomai	Dazu	AS1655	-	-	-	3	4	3	3	1	2	3	40	40	60	10	10	5	40
	Mianmai	Tongliang	AS1656	-	-	-	3	3	3	2	2	3	3	20	20	60	10	10	20	20
	Hefangxiaomai	Hechuan	AS1657	-	-	-	3	3	2	3	1	1	2	20	20	20	20	5	5	20
	Hongpaideng	Hechuan	AS1658	-	-	-	3	3	3	3	2	2	3	60	40	60	20	5	5	40
	Baixu	Wenjiang	AS1661	-	-	-	3	4	4	3	4	4	4	40	40	100	40	80	60	60
	Baihuaganmaierzi 1	Guanxian	AS1664	-	-	-	3	3	2	2	1	1	2	40	10	10	10	5	5	20
	Baihuaganmaierzi 2	Guanxian	AS1665	-	-	-	1	1	1	1	1	1	1	5	0	5	0	0	0	10
	Baihuamai	Dayi	AS1667	-	-	-	1	1	1	1	1	1	1	0	5	0	0	0	0	5
	Youmangmai	Xinjin	AS1668	-	-	-	3	3	2	2	4	1	2	40	20	10	10	60	5	20
	Baihuaguangtou	Pujiang	AS1669	-	-	-	3	2	1	2	1	1	2	40	5	5	5	5	5	20
	Sihonghuaguangtou	Pengxian	AS1670	-	-	-	1	1	1	1	1	1	1	10	5	5	5	0	0	10
	Pushanmai	Fengdu	AS1672	-	-	-	3	4	3	3	4	2	3	20	60	40	20	80	10	40
	Paidengmai	Fengdu	AS1674	-	-	-	3	1	1	2	1	1	2	40	10	5	10	5	5	20
	Siyuehuang	Dianjiang	AS1675	-	-	-	1	1	1	1	1	1	1	10	5	10	10	0	0	10
	Guangtou	Youyang	AS1676	-	-	-	1	1	1	1	1	1	1	0	10	5	0	0	0	10
	Luohanmai	Kaixian	AS1679	-	-	-	1	1	3	1	1	4	2	10	10	10	5	20	5	20
	Zangzuxiaomai	Qianning	AS1697	-	-	-	3	4	4	3	4	4	4	40	60	80	40	80	40	60
	Sanyueheshangxiaomai	Nanchong	AS1698	-	-	-	1	1	1	1	1	1	1	10	10	5	5	0	0	10
	Danaokexiaomai	Nanchong	AS1699	-	-	-	3	2	3	2	1	2	2	40	5	20	10	5	5	20
	Luoxiamai	Langzhong	AS1701	-	-	-	1	2	2	1	1	1	2	10	10	20	10	5	0	10
	Bailanmai	Yingshan	AS1702	-	-	-	2	2	1	1	1	1	2	40	10	5	5	5	5	20
	Sanyuehuang	Tongjiang	AS661571	ZM007757	-	-	1	3	1	2	1	1	1	5	20	10	10	5	0	10
	Hongxumai	Guangan	AS661602	ZM008008	-	-	1	1	2	2	1	1	3	5	10	5	5	5	5	60
	Baikejiang	Xiushan	AS661626	ZM008244	-	-	3	3	3	3	1	2	2	40	40	20	20	5	10	20
	Huangmaizi	Changning	AS661583	ZM007813	-	-	1	1	1	1	1	1	3	0	5	5	5	5	5	20
	Baimaier	Qianwei	AS661655	ZM008569	-	-	1	1	3	2	1	2	4	10	10	20	5	5	5	80
	Yicuomao	Xichong	AS661642	ZM008424	-	-	2	2	3	2	2	3	4	20	20	40	10	20	10	60
	Yuweimai	Dazu	AS661615	ZM008139	-	-	2	3	3	3	3	3	3	20	40	40	20	40	5	60
	Huayangxiaomai	Shuangliu	AS661617	ZM008181	-	-	3	1	3	2	1	2	2	60	10	20	10	5	5	10
	Zaohuangmai	Naxi	AS661593	ZM007878	-	-	3	4	3	2	2	2	3	40	40	40	5	10	5	40
	Yuzuiweimai	Luxian	AS661584	ZM007826	-	-	1	2	1	2	1	1	3	10	20	5	10	0	5	40
	Hongmangmaizi	Yiguo	AS661634	ZM008348	-	-	3	1	1	2	1	1	2	20	10	5	10	0	0	40
	Lushanmai	Jiangyou	AS661605	ZM008053	-	-	1	1	1	1	1	1	2	5	10	0	0	0	0	20
	Baikexuxusanyuehuang	Liangping	AS661658	ZM008588	-	-	3	3	1	2	1	3	3	20	60	20	10	0	5	60
	Hechuanmai	Hechuan	AS661616	ZM008155	-	-	1	2	1	2	1	1	2	5	20	5	10	5	5	20
	Zaodongmai	Nanchong	AS661637	ZM008370	-	-	1	2	1	1	1	1	3	10	60	5	5	5	0	60
	Wuyangmai	Yibin	AS661582	ZM007805	-	-	3	3	3	2	2	3	3	80	60	40	20	10	40	60
	Youtiaomai	Luxian	AS661586	ZM007838	-	-	1	1	1	1	1	1	3	0	0	5	5	5	0	40
	Tuotuomai	Suining	AS661609	ZM008074	-	-	1	3	2	2	1	1	3	0	10	20	5	0	5	40
	Guangguangtou	Xinjin	AS661620	ZM008190	-	-	3	3	2	2	1	1	2	40	40	20	20	5	5	20
	Ranriwumangmai	Shiqu	AS661778	ZM011729	-	-	3	3	3	4	4	4	1	20	80	80	80	80	100	20
	Gaoshanzaoshuxiaomai	Xinlong	AS661775	ZM011713	-	-	1	3	1	2	1	4	3	5	20	5	10	10	5	40
	Yupi	Decang	AS661599	ZM007976	-	-	4	4	4	4	4	4	1	100	60	100	100	80	100	10
	Zhaonixiaomai	Yajiang	AS661777	ZM011720	-	-	3	3	1	2	1	4	3	20	80	5	10	0	5	40
	Huanghuaxiaomai	Qionglai	AS661619	ZM008186	-	-	3	4	3	4	4	4	3	20	40	60	60	80	60	40
	Baiyuxiaomai	Baiyu	AS661768	ZM011593	-	-	2	3	1	1	1	1	4	5	40	0	5	0	0	80
Cultivars	Chuanmai 28	Sichuan Academy of Agricultural Sciences	-	-	[(Wanya 2 / 2874) // (Gaojiasuo / 2874) ] /// Mianyang 19	1997	4	4	4	3	4	4	4	100	80	100	60	80	100	80
	Chuanmai 29	Sichuan Academy of Agricultural Sciences	-	-	(Tai 2874 / 7781-1-2) // (K4 / 305)	1997	3	4	4	3	4	4	4	40	80	80	60	60	60	60
	Mianyang 27	Mianyang Academy of Agricultural Sciences	-	-	81-5 / 81-24	1997	4	4	4	3	4	3	4	100	60	100	80	80	40	80
	Mianyang 28	Mianyang Academy of Agricultural Sciences	-	-	T79350-1-4 / Mianyang 11	1997	4	4	4	4	4	3	4	100	100	100	80	80	60	80
	Chuanmai 30	Sichuan Academy of Agricultural Sciences	-	-	03FR1349-1/54789//Chuannong 27	1998	2	4	4	2	4	4	3	20	80	80	20	60	60	60
	Chuanyu 14	Chengdu institute of biology, Chinese Academy of Sciences	-	-	9902 / 21646	1998	4	4	4	4	4	4	4	80	100	100	60	80	40	80
	Mianyang 26	Mianyang Academy of Agricultural Sciences	-	-	Mianyang81-5 / Chuanyu81-24	1998	4	4	4	3	4	3	4	80	80	80	80	80	40	60
	Panmai 6	Panzhihua Academy of Agricultural Sciences	-	-	12632 / Xingmai18	1998	3	4	4	4	4	4	4	40	100	80	80	80	80	80
	Mianyang 29	Mianyang Academy of Agricultural Sciences	-	-	Mianyang11 / 95-3	1999	4	4	4	3	4	2	3	80	60	80	20	80	10	60
	Panmai 7	Panzhihua Academy of Agricultural Sciences	-	-	Xingyuan 1 / Mianyang 15	1999	4	4	4	4	4	4	4	60	80	100	80	100	80	80
	Chuanmai 107	Sichuan Academy of Agricultural Sciences	-	-	246 / 80-28-7	2000	3	3	2	2	2	3	3	40	40	10	10	10	5	20
	Chuannong 7	Sichuan Agricultural University	-	-	Mianyang11 / 84-2014	2000	3	3	3	4	3	4	3	20	80	60	40	10	60	40
	Changmai 32	Xichang Academy of Agricultural Sciences	-	-	1900"S" / Ning8349 // 1900	2001	1	1	1	1	1	1	1	10	10	5	5	5	5	10
	Chuanmai 32	Sichuan Academy of Agricultural Sciences	-	-	1900"S"Ning8439 / 1900	2001	1	1	1	2	1	3	2	5	10	10	20	5	10	10
	Chuannong 11	Sichuan Agricultural University	-	-	78-5038 / 85-D·H·5075	2001	4	4	3	4	4	4	4	100	80	60	40	20	80	60
	Miannong 7	SouthWest University of Science and Technology	-	-	85-42 / Bamai18	2001	1	2	2	2	2	3	2	10	40	10	5	20	20	20
	Chuanfu 5	Sichuan Academy of Agricultural Sciences	-	-	Mianyang 88-33 / 88-11525	2002	3	4	3	3	4	4	3	60	80	40	10	80	100	60
	Chuanmai 33	Sichuan Academy of Agricultural Sciences	-	-	2469 / 80-28-7	2002	3	3	2	2	1	4	3	60	60	10	10	5	20	40
	Chuanmai 35	Sichuan Academy of Agricultural Sciences	-	-	SW1862 / 2469	2002	2	4	3	3	1	3	3	20	80	40	40	5	5	40
	Chuanmai 36	Sichuan Academy of Agricultural Sciences	-	-	Milan / SW5193	2002	3	4	1	3	2	2	2	60	80	5	10	5	5	40
	Chuannong 12	Sichuan Agricultural University	-	-	91S-23 / A302	2002	1	2	1	2	1	3	2	10	20	5	5	5	5	10
	Chuannong 16	Sichuan Agricultural University	-	-	Chuanyu12 / 87-429	2002	4	4	3	4	4	4	4	100	100	60	5	20	100	60
	Chuannong 17	Sichuan Agricultural University	-	-	91S-23 / A302	2002	2	1	1	1	1	1	1	20	20	5	0	0	5	10
	Chuanyu 16	Chengdu institute of biology, Chinese Academy of Sciences	-	-	(30020 / 8619-10) // Jinmai30	2002	2	3	3	3	3	4	3	20	40	60	5	40	80	40
	Mianyang 31	Mianyang Academy of Agricultural Sciences	-	-	Mianyang91-310 / Chuanzhi89-076	2002	1	3	4	3	2	3	3	20	60	100	60	20	40	60
	Chuanmai 37	Sichuan Academy of Agricultural Sciences	-	-	88Fan / 88-309	2003	2	2	1	3	1	2	2	40	60	10	20	0	5	20
	Chuanmai 38	Sichuan Academy of Agricultural Sciences	-	-	Syn-CD769 / SW89-3243 // Chuan6415	2003	2	3	4	3	2	4	3	60	60	80	20	20	80	60
	Chuanmai 39	Sichuan Academy of Agricultural Sciences	-	-	Mo444 / 90-7	2003	3	1	1	1	1	3	2	40	10	5	5	5	5	20
	Chuanmai 41	Sichuan Academy of Agricultural Sciences	-	-	91T4135 / 88Fan8	2003	3	4	3	3	2	4	3	80	80	80	40	10	100	60
	Chuanmai 42	Sichuan Academy of Agricultural Sciences	-	-	SynCD768 / SW3243 // Chuan6415	2003	3	4	3	3	2	4	3	80	80	60	40	10	100	60
	Chuannong 10	Sichuan Agricultural University	-	-	78-5038 / 85-D.H.5015	2003	4	4	3	4	3	4	4	80	80	60	60	10	80	60
	Chuannong 18	Sichuan Agricultural University	-	-	R164-1 / A302-1	2003	2	1	1	1	1	1	1	20	20	5	5	10	5	20
	Chuannong 19	Sichuan Agricultural University	-	-	Qian 1104A/R935	2003	1	1	1	1	1	1	1	0	10	0	0	5	0	10
	Chuanyu 18	Chengdu institute of biology, Chinese Academy of Sciences	-	-	Chuanyu 5 / Mo460 // 94F2-4	2003	1	2	1	1	2	1	1	20	10	5	0	10	5	10
	Chuanyu 19	Chengdu institute of biology, Chinese Academy of Sciences	-	-	(Chuanyu 5 / Mo460) / Mianyang 26	2003	2	1	1	1	1	1	1	20	10	5	5	20	5	20
	Mianyang 30	Mianyang Academy of Agricultural Sciences	-	-	Mianyang01821 / 83-13028 // Mianyang0552014	2003	4	4	4	3	4	3	4	100	80	100	20	20	40	60
	Mianyang 33	Mianyang Academy of Agricultural Sciences	-	-	1294 / Mianyang86-5	2003	2	3	3	2	3	3	3	10	60	60	10	10	20	40
	Mianyang 35	Mianyang Academy of Agricultural Sciences	-	-	05363-8-1 / Mianyou 2	2003	1	1	3	1	1	1	2	5	10	20	5	0	5	10
	Neimai 8	Neijiang Academy of Agricultural Sciences	-	-	Mianyang26 / 92R178	2003	4	3	4	3	4	4	4	100	80	100	20	60	80	80
	Rongmai 2	Chengdu Academy of Agricultural and Forestry Sciences	-	-	53283 / 90M776	2003	4	2	3	3	1	4	3	80	40	20	5	20	10	40
	Xichang 18	Xichang Academy of Agricultural Sciences	-	-	(5595 / Zhong7605) /// ((76-4 / Xin76-6) // 301)	2003	2	1	2	1	1	2	2	40	10	10	5	5	20	20
	Xifu 12	Xichang Academy of Agricultural Sciences	-	-	85γ×876 / 85γ-118	2003	1	2	3	1	2	3	2	10	40	40	10	10	20	20
	Xikemai 1	SouthWest University of Science and Technology	-	-	Mianyang88-304 / Mo-212	2003	3	3	4	3	3	4	3	100	20	80	60	60	20	60
	Chuanmai 43	Sichuan Academy of Agricultural Sciences	-	-	SynCD768 / SW3243 // Chuan6415	2004	3	4	3	3	2	4	3	60	60	60	40	20	40	40
	Chuanmai 44	Sichuan Academy of Agricultural Sciences	-	-	96Xia440 / Guinong21	2004	3	4	3	3	1	4	3	60	60	60	20	5	5	40
	Chuannong 21	Sichuan Agricultural University	-	-	R841/Qianhui 3	2004	1	1	1	1	1	1	1	5	5	5	0	5	0	10
	Liangmai 2	Sichuan Agricultural University	-	-	Mianyang 26 /// ( 10-A/88-1643// Chuanyu 12 )	2004	4	3	2	1	2	4	3	100	60	10	10	10	5	40
	Mianmai 37	Mianyang Academy of Agricultural Sciences	-	-	96EW37 / Mianyang90-100	2004	3	4	4	3	4	4	4	60	80	80	60	80	40	60
	Mianmai 38	Mianyang Academy of Agricultural Sciences	-	-	07146-12-1 / Guinong19-4	2004	3	1	2	2	2	3	2	60	20	5	5	10	10	20
	Neimai 9	Neijiang Academy of Agricultural Sciences	-	-	Mianyang26 / 92R178	2004	4	4	4	4	4	4	4	100	80	100	80	80	80	80
	Xichang 19	Xichang Academy of Agricultural Sciences	-	-	1712 / 1761	2004	1	1	1	1	1	1	1	0	0	0	0	0	5	5
	Xifu 13	Xichang Academy of Agricultural Sciences	-	-	85γ-876 / 85γ-118	2004	1	2	3	1	2	3	2	10	20	20	5	10	20	20
	Xingmai 2	Neijiang Academy of Agricultural Sciences	-	-	Mianyang 26 / 92R178	2004	4	3	3	4	4	4	4	100	60	60	60	80	60	60
	Chuanmai 45	Sichuan Academy of Agricultural Sciences	-	-	GH430 / SW1862	2005	1	3	2	2	1	2	2	20	60	10	10	10	5	20
	Chuanmai 46	Sichuan Academy of Agricultural Sciences	-	-	Ta193-6280 / 96-5429	2005	1	2	1	1	1	1	1	20	20	5	10	0	5	20
	Chuanmai 47	Sichuan Academy of Agricultural Sciences	-	-	Syn-CD786 / Mianyang26 // Mianyang26	2005	4	4	3	3	1	4	3	100	60	40	20	20	20	40
	Chuannong 22	Sichuan Agricultural University	-	-	R164 / 86-104	2005	3	3	1	2	2	1	2	40	40	5	5	5	5	20
	Chuannong 23	Sichuan Agricultural University	-	-	R1685 / MY26	2005	4	4	1	3	2	3	3	100	80	5	10	10	10	40
	Kechengmai 1	Chengdu institute of biology, Chinese Academy of Sciences	-	-	Guinong 22 / Chuanyu 12	2005	3	3	3	2	4	3	3	60	20	20	10	60	60	40
	Liangmai 3	Sichuan Agricultural University	-	-	N711 / N301-1-1	2005	1	2	1	2	1	2	2	10	40	5	5	5	5	20
	Mianmai 39	Mianyang Academy of Agricultural Sciences	-	-	Mianyang96-78 / Guinong21-1	2005	2	1	1	1	4	1	2	40	5	0	5	40	10	20
	Mianmai 40	Mianyang Academy of Agricultural Sciences	-	-	Mianyang01821 / Guinong19-4	2005	3	1	1	1	2	1	2	40	20	10	5	20	5	20
	Xikemai 2	SouthWest University of Science and Technology	-	-	Chuanyu 11 / Mo444	2005	1	1	1	1	1	1	1	5	0	0	0	5	5	10
	Changmai 26	Xichang Academy of Agricultural Sciences	-	-	3461 / Xichang 16	2006	1	1	1	1	1	1	1	5	0	5	5	5	5	10
	Chuanmai 48	Sichuan Academy of Agricultural Sciences	-	-	SW8188 / SW8688	2006	1	1	1	1	1	1	1	5	10	0	20	0	0	10
	Chuanmai 49	Sichuan Academy of Agricultural Sciences	-	-	Guinong 21 / Shenghe 3295	2006	3	3	2	4	2	4	3	100	60	10	60	5	10	40
	Chuanyu 20	Chengdu institute of biology, Chinese Academy of Sciences	-	-	SW3243 // 35050 / 21530	2006	2	2	1	1	1	1	2	20	20	10	5	10	5	20
	Mianmai 41	Mianyang Academy of Agricultural Sciences	-	-	Mianyang01821 / 90Zhong165 // Guinong19-4	2006	1	1	1	1	-	1	1	20	20	10	5	10	5	20
	Mianmai 42	Mianyang Academy of Agricultural Sciences	-	-	Mianyang96-5 / Guinong21-1	2006	1	1	1	1	1	1	1	0	5	0	0	0	0	5
	Xifu 14	Xichang Academy of Agricultural Sciences	-	-	Xichangfanxiumai treated by 60Coγ ray and kept self-pollination to get generation 6	2006	1	3	2	1	1	1	2	20	10	10	5	5	5	20
	Zimai 1	Sichuan Wanfa Seeds Industry Co., Ltd.	-	-	Mianyang 29 / Chuanmai 25	2006	2	2	1	3	1	2	2	10	20	5	5	5	0	10
	Chengdianmai 1	University of Electronic Science and Techonology of China	-	-	MY92-8 / 91S-5-4	2007	3	1	1	1	1	1	2	60	10	5	5	5	0	20
	Chuannong 24	Sichuan Agricultural University	-	-	Baili 3 / Yunfan 52894-2	2007	2	1	1	1	1	1	1	10	20	5	5	10	5	10
	Chuannong 25	Chengdu Zhenglong Plant Breeding Co., Ltd.& Sichuan Agricultural University	-	-	96I-225 / 91S-5-4	2007	4	2	1	1	1	1	2	60	80	10	60	10	5	40
	Chuanyu 21	Chengdu institute of biology, Chinese Academy of Sciences	-	-	Zhou88114 / G159	2007	1	1	1	1	2	2	2	10	5	10	5	10	10	10
	Liangmai 4	Sichuan Agricultural University	-	-	N1491 / N1071	2007	1	2	1	1	1	2	2	10	20	10	10	5	5	20
	Mianmai 1403	Mianyang Academy of Agricultural Sciences	-	-	Mianyang04854 / Guinong21-1	2007	1	1	1	1	1	1	1	20	80	5	5	5	5	20
	Mianmai 45	Mianyang Academy of Agricultural Sciences	-	-	07146-12-1 / Guinong19-4	2007	1	1	2	1	1	1	1	5	40	10	5	5	5	20
	Neimai 11	Neijiang Academy of Agricultural Sciences	-	-	Mianyang26 / 92R178	2007	4	3	4	3	4	4	4	100	80	100	80	80	80	80
	Rongmai 4	Chengdu Academy of Agricultural and Forestry Sciences	-	-	96-2547 / 133-3	2007	4	3	3	4	3	4	3	100	40	40	60	20	80	60
	Shumai 375	Sichuan Agricultural University	-	-	(Mianyang93-7 / 92R141) // Mianyang96-324	2007	3	4	3	1	4	4	3	60	80	60	5	40	100	60
	Xikemai 3	SouthWest University of Science and Technology	-	-	Guinong21 / 5575	2007	3	4	4	4	4	4	4	60	60	100	100	80	80	80
	Xikemai 4	SouthWest University of Science and Technology	-	-	Mo460 / 9601-3	2007	1	1	1	2	1	1	1	5	0	5	10	5	5	10
	Changmai 28	Xichang Academy of Agricultural Sciences	-	-	1712 / 1761	2008	1	1	1	1	1	1	1	5	5	5	5	0	10	10
	Chuanmai 50	Sichuan Academy of Agricultural Sciences	-	-	Guinong 21 / 3295	2008	3	3	2	4	2	4	3	80	60	20	60	5	10	40
	Chuanmai 51	Sichuan Academy of Agricultural Sciences	-	-	174 / 183 // 99-1572	2008	4	4	3	4	3	4	4	100	100	60	80	20	100	80
	Chuanmai 52	Sichuan Academy of Agricultural Sciences	-	-	Chuanmai 36 / SW1862	2008	3	2	2	3	2	4	3	60	40	10	10	5	100	40
	Chuanyu 23	Chengdu institute of biology, Chinese Academy of Sciences	-	-	R59 // Zheng9023 / H435	2008	1	1	1	1	1	1	1	5	0	0	0	5	0	10
	Mianmai 185	Mianyang Academy of Agricultural Sciences	-	-	Mianyang96-5 / Liaochun 10	2008	3	3	4	2	4	4	3	40	40	100	10	100	60	60
	Mianmai 46	Mianyang Academy of Agricultural Sciences	-	-	07242-3-1-1 / Guinong21	2008	4	4	4	4	4	4	4	100	60	100	80	80	80	80
	Rongmai 757	Chengdu Xingfeng Agricultural Technology Co., Ltd.	-	-	T274 / 283	2008	4	4	4	4	4	4	4	80	100	80	80	100	80	80
	Shumai 482	Sichuan Agricultural University	-	-	(Mianyang93-7 / 92R141) // Mianyang96-324	2008	4	4	4	4	4	4	4	100	100	100	80	20	100	80
	Xikemai 5	SouthWest University of Science and Technology	-	-	Guinong21 / 96Ⅱ-39	2008	3	3	3	3	2	3	3	40	20	80	80	40	40	40
	Xikemai 6	SouthWest University of Science and Technology	-	-	Mianyang95-325 / 92R-135	2008	-	1	2	1	1	1	1	5	5	10	5	5	5	10
	Bomai 1	Zizhong Ruibo Crop Seed Research Institute	-	-	Mianyang29 / Chuanmai30	2009	3	2	2	2	1	4	2	60	20	10	10	10	20	20
	Chuanmai 53	Sichuan Academy of Agricultural Sciences	-	-	477 / Miannong 4 // Y314	2009	2	1	1	1	1	4	2	20	20	5	5	5	40	20
	Chuanmai 54	Sichuan Academy of Agricultural Sciences	-	-	92R171 / 98Jian335 // DH1523	2009	3	4	3	4	3	4	3	80	80	60	80	60	100	80
	Chuanmai 55	Sichuan Academy of Agricultural Sciences	-	-	SW3243 / SW8688	2009	2	1	1	2	2	3	2	10	20	5	5	10	80	20
	Chuanmai 56	Sichuan Academy of Agricultural Sciences	-	-	Chuanmai30 / Chuanmai42	2009	1	3	2	2	1	3	2	10	20	40	5	10	5	20
	Chuannong 26	Chengdu Zhenglong Plant Breeding Co., Ltd.& Sichuan Agricultural University	-	-	Chuannong19 / R3301	2009	2	1	1	2	2	1	2	20	10	5	5	10	5	10
	Chuannong 27	Sichuan Agricultural University	-	-	Chuannong19 / R3301	2009	1	1	1	1	1	1	1	10	5	0	0	0	5	10
	Chuanyu 24	Chengdu institute of biology, Chinese Academy of Sciences	-	-	Zhou88114 / G394	2009	3	2	2	2	4	1	2	40	10	10	10	40	5	20
	Jinkemai 33	Puchuanyong and Puchunlei	-	-	Mila / 172	2009	3	3	3	3	2	3	3	60	60	20	60	20	10	40
	Kechengmai 2	Chengdu institute of biology, Chinese Academy of Sciences	-	-	Xianyang(big spike)/E // 1/3 / Guinong20/4 / Mianyang26	2009	4	4	3	2	4	4	3	100	60	80	5	80	60	60
	Mianmai 43	Mianyang Academy of Agricultural Sciences	-	-	07146-12-1 (Mianyang92-8 / 88-304) / Guinong19-4	2009	1	1	1	1	1	-	1	0	20	5	0	5	5	10
	Mianmai 48	Mianyang Academy of Agricultural Sciences	-	-	Mianyang01821 / Guinong19-4	2009	1	2	2	1	2	1	2	10	40	10	5	10	5	20
	Xianmai 99	Sichuan Queliang Seeds Industry Co., Ltd.	-	-	T10090 / YT4-8	2009	2	1	1	1	1	1	1	20	5	0	5	0	5	10
	Yumai 1	Sichuan Shenglong Tianxiang Technology Co., Ltd.	-	-	R59 / 4551	2009	1	1	1	4	4	4	3	10	5	5	80	100	80	40
	Chuanchongzu 125	Sichuan Academy of Agricultural Sciences	-	-	Chuanmai 42 / Chuanmai 16	2010	2	1	1	2	1	1	1	20	5	5	10	10	0	10
	Chuanmai 58	Sichuan Academy of Agricultural Sciences	-	-	Chuanmai 42 / 03 Jian 3 // Chuanmai 42	2010	2	2	1	1	1	4	2	20	10	5	0	10	5	10
	Neimai 3416	Neijiang Academy of Agricultural Sciences	-	-	R57 / Ping 5	2010	4	3	4	2	4	4	3	80	80	80	10	60	80	60
	Chuanmai 60	Sichuan Academy of Agricultural Sciences	-	-	98-1231 // Guinong 21 / Shenghe3295	2011	3	4	3	4	3	4	3	80	80	60	60	40	100	60
	Guohaomai 15	Sichuan Guohao Seeds Industry Co., Ltd.	-	-	Mianyang96-5 / Gui19-4 // NE	2011	1	1	2	1	2	1	2	10	5	20	5	10	10	20
	Mianmai 228	Mianyang Academy of Agricultural Sciences	-	-	1275-1 / Nei2938 // 99-1522	2011	4	4	4	4	4	4	4	100	80	100	80	80	100	80
	Chuanmai 104	Sichuan Academy of Agricultural Sciences	-	-	Chuanmai 42 / Chuannong 16	2012	3	2	1	1	1	1	2	40	5	5	5	10	5	20
	Chuanmai 61	Sichuan Academy of Agricultural Sciences	-	-	Zheng 9023 / Jian3/2 / Jian3/3 / 1522	2012	2	1	2	4	1	4	2	20	40	10	40	5	5	20
	Chuanmai 62	Sichuan Academy of Agricultural Sciences	-	-	Fr3 / SW1862	2012	2	1	1	1	1	1	1	0	5	5	0	5	0	10
	Mianmai 51	Mianyang Academy of Agricultural Sciences	-	-	1275-1 / 99-1522	2012	2	4	4	3	4	4	3	60	60	100	80	80	60	80
	Nanmai 302	Nanchong Academy of Agricultural Sciences	-	-	16-1 / PanzaoR	2012	2	2	1	2	1	3	2	20	20	10	5	10	10	20
	Xikemai 7	SouthWest University of Science and Technology	-	-	Chuanyu11 / Mo444	2012	3	3	4	4	4	4	4	60	80	100	20	60	10	60
	Y11-1741	Sichuan Agricultural University	-	-	Zimai 1 / Mianyang2003-1	2012	4	3	4	4	4	4	4	100	80	100	80	100	80	80
	Chuanmai 63	Sichuan Academy of Agricultural Sciences	-	-	01-3570 / R138	2013	3	4	3	4	2	4	3	80	60	60	60	40	80	60
	Chuanmai 64	Sichuan Academy of Agricultural Sciences	-	-	Chuanmai 42 / Chuannong 16	2013	3	1	1	2	2	1	2	80	10	5	5	10	0	20
	Chuanmai 65	Sichuan Academy of Agricultural Sciences	-	-	98-1231 // Guinong21 / Shenghe3295	2013	4	4	4	4	4	4	4	100	80	100	100	80	100	80
	Mianmai 1618	Mianyang Academy of Agricultural Sciences	-	-	1275-1 // Nei2938 / 99-1522	2013	4	3	4	3	4	4	4	100	40	100	20	80	60	60
	Nanmai 618	Nanchong Academy of Agricultural Sciences	-	-	2001-43-1 / PanzaoR	2013	3	3	3	4	3	4	3	40	20	40	80	60	80	60
	Shumai 51	Sichuan Agricultural University	-	-	N711 / N2401	2013	4	4	4	4	3	4	4	100	60	60	80	20	100	60
	Shumai 969	Sichuan Agricultural University	-	-	SHW-L1 / SW8188 // Chuanyu18/3 / Chuanmai 42	2013	3	1	1	2	3	1	2	60	10	5	5	80	0	40
	Teyanmainan 88	Nanchong Academy of Agricultural Sciences	-	-	16-1 / PanzaoR	2013	3	3	3	1	2	4	3	40	60	40	5	10	40	40
	Xikemai 8	SouthWest University of Science and Technology	-	-	97-392 / Yun225747-5	2013	3	1	3	1	2	1	2	40	10	40	10	10	5	20
	Chuanmai 1131	Sichuan Academy of Agricultural Sciences	-	-	01-3570 / R138	2014	-	-	-	4	2	4	3	-	-	-	60	20	80	60
	Chuanmai 1145	Sichuan Academy of Agricultural Sciences	-	-	01-3570 / R138	2014	-	-	-	4	3	4	4	-	-	-	80	40	80	60
	Chuanmai 1247	Sichuan Academy of Agricultural Sciences	-	-	L239-248-5 / 07225	2014	-	-	-	1	1	1	1	-	-	-	5	5	5	20
	Chuanmai 66	Sichuan Academy of Agricultural Sciences	-	-	99-1572 / 98-266 // 01-3570	2014	-	3	2	4	2	4	3	-	40	20	40	20	20	40
	Chuanmai 67	Sichuan Academy of Agricultural Sciences	-	-	99-1572 / SW8688 // 01-3570	2014	-	4	3	4	2	4	3	-	60	40	60	20	60	60
	Chuanmai 80	Sichuan Academy of Agricultural Sciences	-	-	Zheng005 / 1522 // 1522	2014	-	3	3	4	4	4	4	-	20	40	40	40	20	40
	Chuanmai 90	Sichuan Academy of Agricultural Sciences	-	-	Jian38 / 99116 // Chuanmai42	2014	-	1	1	2	1	4	2	-	5	5	5	5	5	10
	Chuanmai 91	Sichuan Academy of Agricultural Sciences	-	-	Neimai 8 / Zheng9023 // 00062/3 / Chuanmai42	2014	-	4	4	4	4	4	4	-	80	100	100	60	100	80
	Rongchuannanmai 1	Nanchong Academy of Agricultural Sciences & Sichuan Rongchun Seed Industry Co., Ltd.	-	-	16-1 / PanzaoR	2014	-	4	3	4	3	4	4	-	60	40	80	10	80	60
	Xikemai 9	SouthWest University of Science and Technology	-	-	Nei4301 / Mianyang 31	2014	4	4	4	4	4	4	4	100	80	100	80	100	80	80
	Yimai 9	Yibin Academy of Agricultural Sciences	-	-	R59 / Yi97-24	2014	-	3	3	3	3	3	3	-	80	60	60	40	20	60
	Zhongkemai 138	Chengdu institute of biology, Chinese Academy of Sciences	-	-	Chuanmai 42 / Chuanyu 16	2014	-	4	4	3	4	4	4	-	20	100	10	80	100	60
	Zhongkemai 47	Chengdu institute of biology, Chinese Academy of Sciences	-	-	W7268 / durum wheat // Chuanmai 107	2014	-	3	3	2	3	4	3	-	5	40	10	40	40	40
	Chuanfu 7	Sichuan Academy of Agricultural Sciences	-	-	5X / 4093 (F1 treated with Co-γ)	2015	-	-	-	-	2	2	2	-	-	-	10	10	10	20
	Chuanfu 8	Sichuan Academy of Agricultural Sciences	-	-	39849-14-3 / 03-DH1959	2015	-	-	-	1	1	1	1	-	-	-	0	5	5	20
	Chuanmai 68	Sichuan Academy of Agricultural Sciences	-	-	99-1572 / 98-266 // 01-3570	2015	-	-	-	2	1	3	2	-	-	-	5	5	10	20
	Chuanmai 81	Sichuan Academy of Agricultural Sciences	-	-	SW8019 / 99-1572 // 99-1572	2015	-	-	-	2	2	3	2	-	-	-	10	10	60	40
	Chuanmai 92	Sichuan Academy of Agricultural Sciences	-	-	Neimai 8 / Jian3 // Chuanmai42	2015	-	-	-	2	2	2	2	-	-	-	5	0	10	20
	Chuannong 29	Sichuan Agricultural University	-	-	02017 / R88// R131	2015	-	-	-	3	2	3	3	-	-	-	20	20	20	40
	Chuanyu 25	Chengdu institute of biology, Chinese Academy of Sciences	-	-	Jinding-1 / 41058	2015	-	-	-	1	1	1	1	-	-	-	0	0	0	10
	Kechengmai 4	Chengdu institute of biology, Chinese Academy of Sciences	-	-	37147 / CD02-1574-3	2015	-	-	-	1	1	1	1	-	-	-	5	5	5	20
	Mianmai 112	Mianyang Academy of Agricultural Sciences	-	-	Mian 06-367 / 99-1522	2015	-	-	-	2	4	2	3	-	-	-	10	80	20	40
	Nanmai 991	Nanchong Academy of Agricultural Sciences	-	-	30-9-1 / 04-2-33	2015	-	-	-	2	3	4	3	-	-	-	10	20	40	40
	Neimai 366	Neijiang Academy of Agricultural Sciences	-	-	Balandal 88 / Nei4344	2015	-	-	-	3	4	4	4	-	-	-	10	80	20	40
	Xikemai 10	SouthWest University of Science and Technology	-	-	99-55 / 1257	2015	-	-	-	1	2	1	2	-	-	-	5	5	5	20
	Changmai 33	Xichang Academy of Agricultural Sciences	-	-	02 Jian 2 / Changmai 26	2016	4	1	1	2	2	1	2	60	5	10	10	10	5	20
	Chuanmai 601	Sichuan Academy of Agricultural Sciences	-	-	(Guinong21 / SW3243) / (Chuanmai42 / Chuanmai44)	2016	-	-	-	1	2	1	2	-	-	-	5	10	5	20
	Chuannong 30	Sichuan Agricultural University & Sichuan Yicheng Modern Agricultural Technology Co., Ltd.	-	-	03FR1349-1 / 54789 // Chuannong 27	2016	-	-	-	1	2	1	2	-	-	-	5	5	5	20
	Chuanyu 26	Chengdu institute of biology, Chinese Academy of Sciences	-	-	Chuanyu23 / 4 / G219 / 3 / Chuanyu16 // H5 / Luobulin	2016	-	-	-	1	1	1	1	-	-	-	0	0	0	10
	Guohaomai 3	Sichuan Guohao Seeds Industry Co., Ltd.	-	-	1227-185/99-1522//99-1572	2016	-	-	-	1	2	2	2	-	-	-	5	5	5	20
	Kechengmai 5	Chengdu institute of biology, Chinese Academy of Sciences	-	-	37147 / Chuanmai 37	2016	-	-	-	1	1	1	1	-	-	-	0	0	0	10
	Mianmai 285	Mianyang Academy of Agricultural Sciences	-	-	1275-1 / 99-1522	2016	-	-	-	4	4	4	4	-	-	-	60	80	80	80
	Shumai 126	Sichuan Agricultural University	-	-	Chuanyu 23 / B1291	2016	-	-	-	1	1	1	1	-	-	-	0	0	0	10
	Shumai 921	Sichuan Agricultural University	-	-	030104-13 / Neimai 11	2016	-	-	-	3	3	2	3	-	-	-	5	10	5	20
	Xikemai 18	SouthWest University of Science and Technology	-	-	99-55 / 1257	2016	-	-	-	1	2	1	2	-	-	-	5	5	0	20
a, underline indicates the materials maintained stable high-level resistance to stripe rust in six environments
b, the germplasm resource from Sichuan Agricultural University
c, Chinese National Crop Germplasm resource platform number
d, the infection type 1, 2, 3, 4 is highly resistance (HR), moderately resistance (MR), moderately susceptible (MS) and susceptible (S), respectively.
e, the best linear unbiased prediction values
The symbol - indicates no information is provided or the information is missing
CZ15 = Chongzhou 2015
CZ16 = Chongzhou 2016
MY16 = Mianyang 2016
CZ17 = Chongzhou 2017
MY17 = Mianyang 2017
WJ17 = Wenjiang 2017
